# Supplementary material for: Characterization and expression profiling of glutathione S-transferases in the diamondback moth, Plutella xylostella (L.)
Source: PubMed Central journal article supplement (PMC4358871; doi:10.1186/s12864-015-1343-5), 2015-03-05
Supplement: 12864_2015_1343_MOESM5_ESM.pdf [file 12864_2015_1343_MOESM5_ESM.pdf]

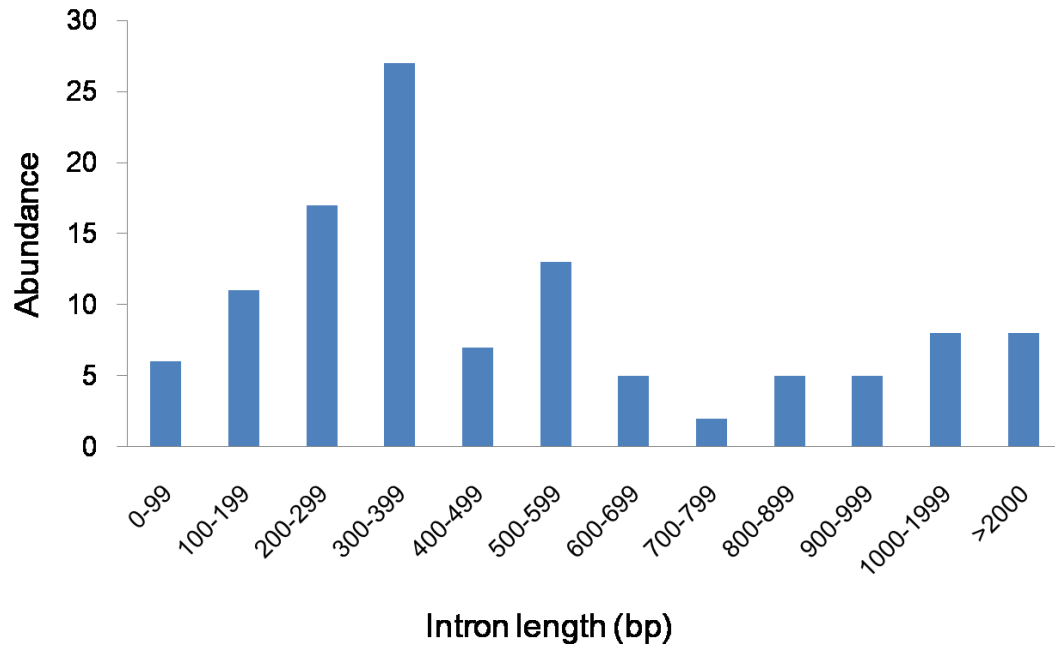

Figure S1 Numerical distribution of intron length in the PxGSTs
