# Supplementary material for: Characterization and expression profiling of glutathione S-transferases in the diamondback moth, Plutella xylostella (L.)
Source: PubMed Central journal article supplement (PMC4358871; doi:10.1186/s12864-015-1343-5), 2015-03-05
Supplement: 12864_2015_1343_MOESM6_ESM.pdf [file 12864_2015_1343_MOESM6_ESM.pdf]

Table S2 GSH and substrate binding sites of the PxGSTs

| Gene    | GSH binding site |     |     |     |     |     |     |     | Substrate binding site |      |      |      |      |      |      |      |      |      |
|---------|------------------|-----|-----|-----|-----|-----|-----|-----|------------------------|------|------|------|------|------|------|------|------|------|
| PxGSTd1 | S14              | H55 | T56 | I57 | E69 | S70 |     |     | L106                   | V110 | S111 | L114 | N115 | S118 | H122 | V166 | N169 | L210 |
| PxGSTd2 | N/A              |     |     |     |     |     |     |     | I102                   | Y106 | Q107 | G110 | D111 | Y114 | F118 | S163 | S166 | F205 |
| PxGSTd3 | S11              | H52 | T53 | I54 | E66 | S67 |     |     | L103                   | Y107 | P108 | A111 | D112 | Y115 | F119 | T164 | T167 | F206 |
| PxGSTd4 | S12              | H53 | T54 | I55 | E67 | S68 |     |     | L104                   | Y108 | D109 | A112 | V113 | Y116 | F120 | T165 | T168 |      |
| PxGSTd5 | S12              | H53 | T54 | I55 | E67 | S68 |     |     | L104                   | Y108 | A109 | A112 | V113 | Y116 | F120 | T165 | T168 | F208 |
| PxGSTe1 | N/A              |     |     |     |     |     |     |     | S119                   | F123 | T180 | T183 |      |      |      |      |      |      |
| PxGSTe2 | N/A              |     |     |     |     |     |     |     | T106                   | F110 | I111 | S114 | S115 | K118 | F122 | T169 | L172 | F210 |
| PxGSTe3 | N/A              |     |     |     |     |     |     |     | C104                   | F108 | P109 | R112 | A113 | A116 | L120 | T166 | G169 | L208 |
| PxGSTe4 | S11              | H53 | T54 | V55 | D67 | S68 |     |     | T104                   | F108 | P109 | R112 | G113 | E116 | F120 | T165 | S168 |      |
| PxGSTe5 | S11              | H53 | T54 | I55 | D67 | S68 |     |     | S104                   | F108 | P109 | R112 | A113 | A116 | F120 | T165 | S168 | F207 |
| PxGSTo1 | N/A              |     |     |     |     |     |     |     | S116                   | Q119 | S120 | F174 | R177 |      |      |      |      |      |
| PxGSTo2 | N/A              |     |     |     |     |     |     |     | T123                   | Q126 | G127 | W181 | R184 |      |      |      |      |      |
| PxGSTo3 | N/A              |     |     |     |     |     |     |     | N122                   | I125 | K126 | W177 | R180 |      |      |      |      |      |
| PxGSTo4 | N/A              |     |     |     |     |     |     |     | T123                   | Q126 | N127 | W181 | Q184 |      |      |      |      |      |
| PxGSTo5 | N/A              |     |     |     |     |     |     |     | N116                   | I119 | T120 | F174 | R177 |      |      |      |      |      |
| PxGSTs1 | Y7               | I13 | Q51 | L52 | P53 | Q64 | S65 |     | Y97                    | W100 | F101 | I105 | P106 | I160 | A163 |      |      |      |
| PxGSTs2 | Y8               | L14 | Q50 | M51 | P52 | Q63 | S64 |     | N96                    | R99  | A100 | A103 | Q104 | V159 | Y162 |      |      |      |
| PxGSTt1 | N/A              |     |     |     |     |     |     |     | H96                    | R100 | A101 | E160 | Q163 |      |      |      |      |      |
| PxGSTu1 | N/A              |     |     |     |     |     |     |     | L100                   | Y104 | A105 | S108 | A109 | L112 | F116 | S163 | T166 | L205 |
| PxGSTu2 | N/A              |     |     |     |     |     |     |     | S104                   | Y108 | V109 | R112 | A113 | F116 | F120 | S166 | S169 | F206 |
| PxGSTz1 | S12              | C14 | R17 | Q43 | Q56 | V57 | E69 | S70 | Q109                   | Q112 | L114 | N170 | R173 |      |      |      |      |      |
| PxGSTz2 | S13              | C15 | R18 | H43 | K56 | V57 | E69 | S70 | V105                   | Q109 | P110 | Q168 | N171 |      |      |      |      |      |
